# Supplementary material
Source: publisher figshare collection journal article supplement (https://acs.figshare.com/ndownloader/files/10090005)
Supplement: Supplementary file 1 [file 10090005]

**Intrinsic size effect in scaffolded porous calcium silicate particles  
and mechanical behavior of their self-assembled ensembles**

*Sung Hoon Hwang<sup>1</sup>, Rouzbeh Shahsavari<sup>1,2,3,4,\*</sup>*

<sup>1</sup>Department of Material Science and Nano Engineering, Rice University, Houston, TX 77005

<sup>2</sup>Department of Civil and Environmental Engineering, Rice University, Houston, TX 77005

<sup>3</sup>The Smalley-Curl Institute, Rice University, Rice University, Houston, TX 77005

<sup>4</sup>C-Crete Technologies LLC, 13000 Murphy Rd, Ste 102, Stafford, TX 77477

\*Corresponding author email: [rouzbeh@rice.edu](mailto:rouzbeh@rice.edu)

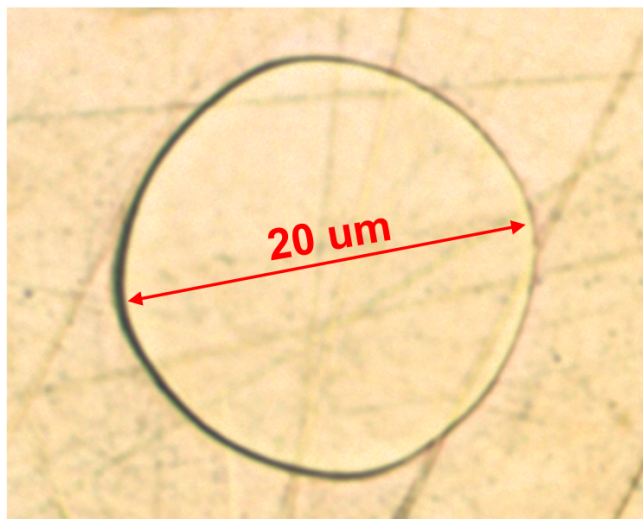

**Fig. S1** Residual impression on a copper substrate after flat-punch indentation.

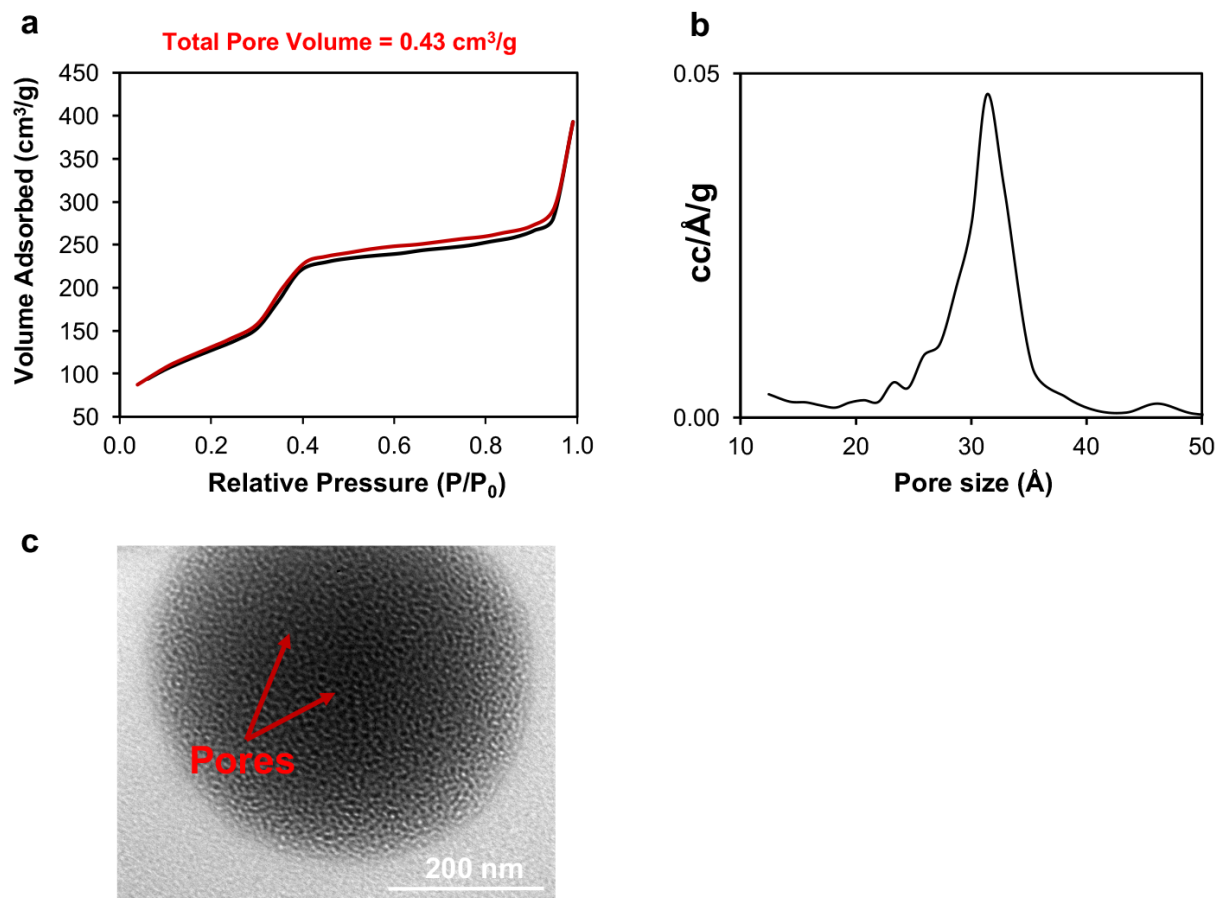

**Fig. S2** a) The representative nitrogen adsorption-desorption curves for the calcium-silicate porous particles. b) The typical distribution of pore size acquired using Barrett-Joyner-Halenda (BJH) analysis.<sup>1</sup> c) TEM image of a typical calcium silicate porous particle.

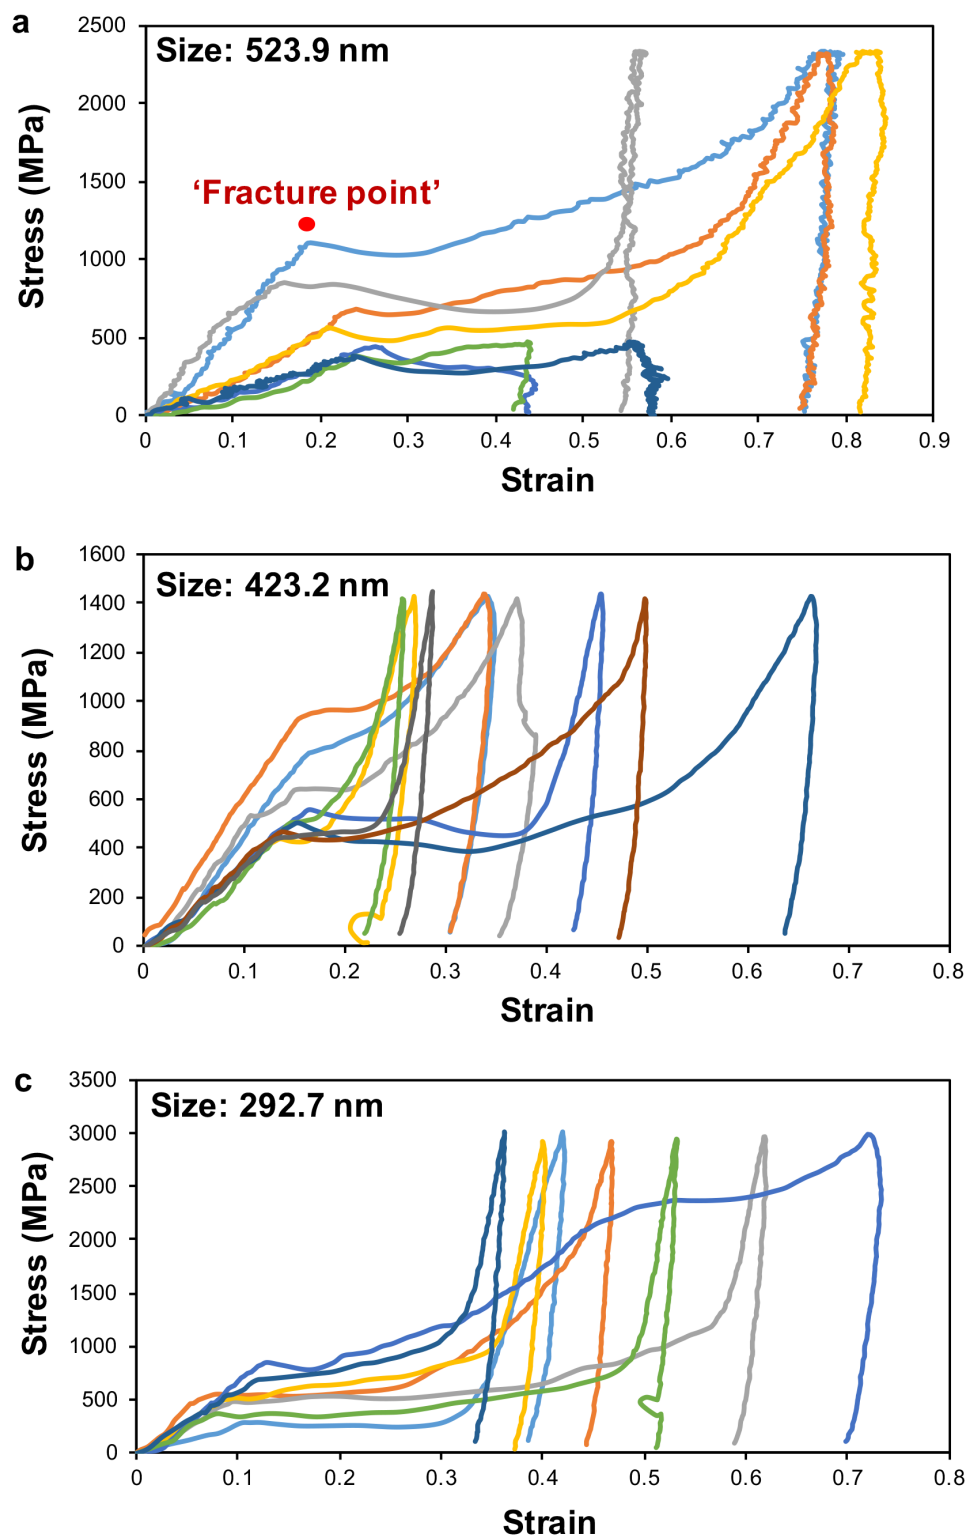

**Fig. S3** Stress-strain curves for the size of a) 523.9 nm b) 423.2 nm and c) 292.7 nm performed beyond the fracture points until the indenter hit the glass substrate.

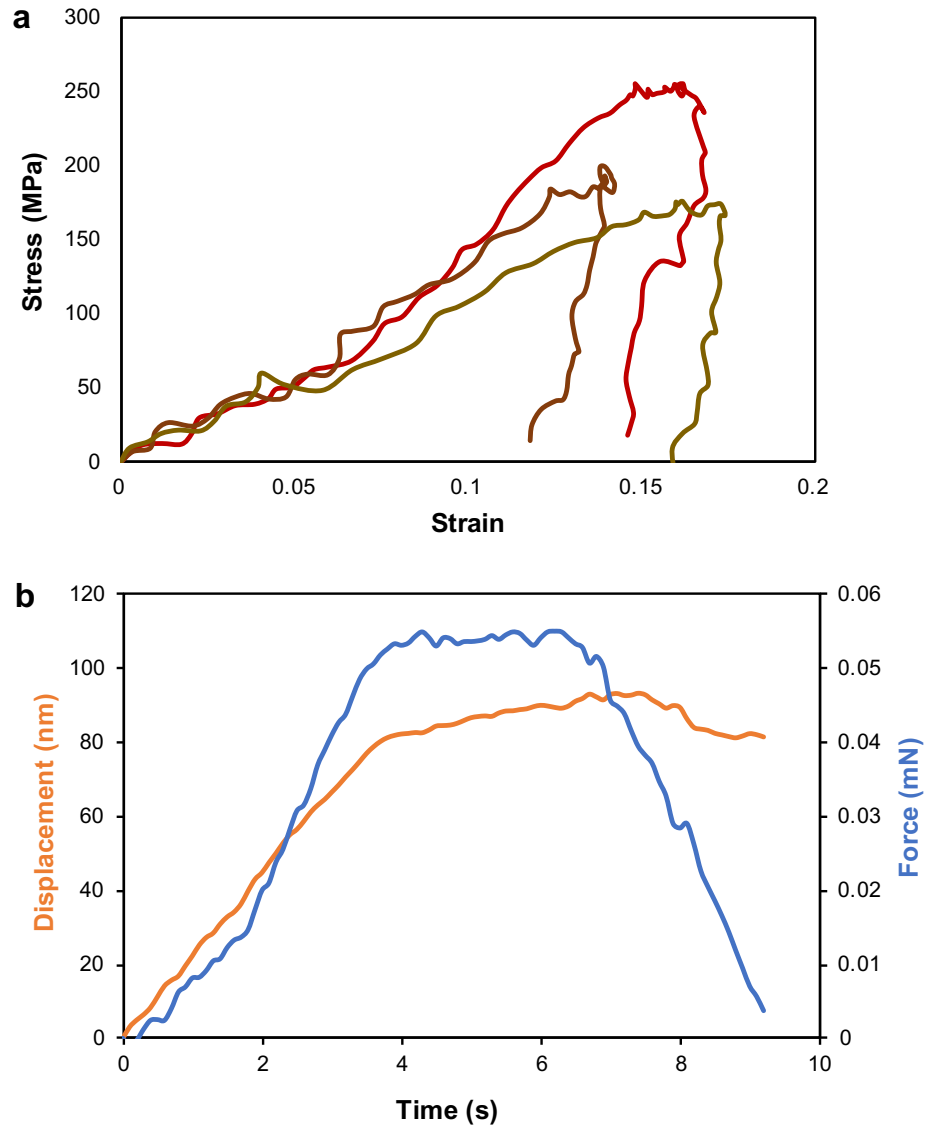

**Fig. S4** a) Displacement-controlled indentations performed on three particles with the size of 523.9 nm before the fracture points are reached. b) Representative Force-Displacement-Time graph for the displacement-controlled indentations.

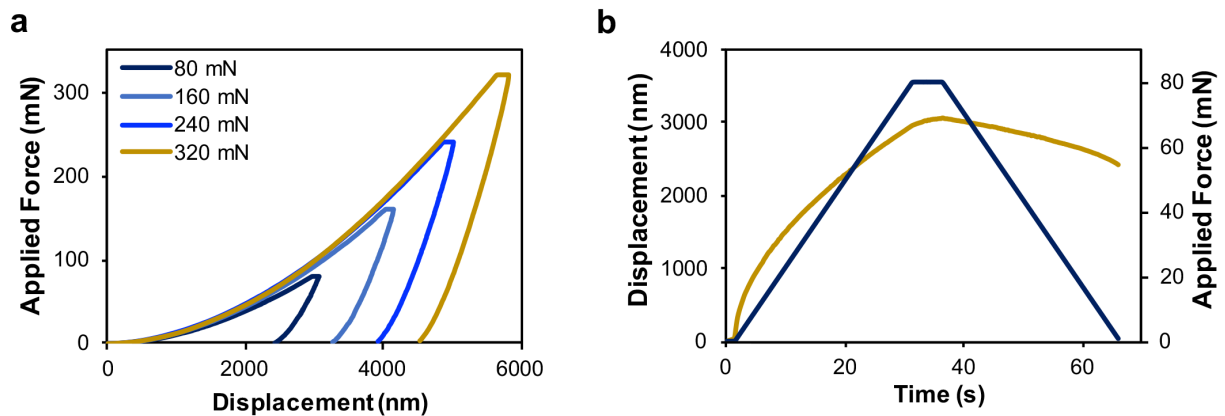

**Fig S5.** a) Force-displacement curves acquired from nanoindentation on the compacted sample at four different applied forces. b) Force-displacement-time curve performed with the applied force of 80 mN.

## Reference

1. Hwang, S. H.; Miller, J. B.; Shahsavari, R., Biomimetic, Strong, Tough, and Self-Healing Composites Using Universal Sealant-Loaded, Porous Building Blocks. *Acs Appl Mater Inter* **2017**, *9* (42), 37055-37063.
